# Supplementary material for: Clues to Evolution of the SERA Multigene Family in 18 Plasmodium Species
Source: PubMed Central journal article supplement (PMC3058004; doi:10.1371/journal.pone.0017775), 2011-03-15
Supplement: pone.0017775.s006.pdf [file pone.0017775.s006.pdf]

Table S1 PCR primers used.

| Forward primers (5' --->3')                                                |                                            | Reverse primers (5' --->3') |                                           |
|----------------------------------------------------------------------------|--------------------------------------------|-----------------------------|-------------------------------------------|
| <b>Degenerate primers</b>                                                  |                                            |                             |                                           |
| <b>For hypothetical protein genes conserved regions</b>                    |                                            |                             |                                           |
| Fb                                                                         | CAAYRCCTTYGAAARRICWGAADTRGATTC             | Rc                          | CCRYTRTTTATRITYTCHRCRCRTC                 |
| <b>For Group II-Group IV SERA gene conserved cysteine protease domains</b> |                                            |                             |                                           |
| FC                                                                         | CAHACDGYWGTTKDTTTTAA                       | RA                          | TAYAYRYTRCARAAAADRCART                    |
| FE                                                                         | AAHATMGAAGTRGAAGARCAAGG                    | RB                          | CTTDGTTAARCARTADCCDGG                     |
| FF                                                                         | TAYTGTGAYAGRTGGMAAGATAAAAC                 | RC                          | TTAAAHAMAACWRCHGDTG                       |
| FG                                                                         | TGYAAYDANGANTAYTYRAYMG                     | RD                          | CARTARTAHCCCCARCTRITTC                    |
| FJ                                                                         | ATNARRTYGATGARRGGNYA                       | RH                          | ATRTRTTNCCRTANCCNAYDATRIT                 |
|                                                                            |                                            | RI                          | CNRCNGTRTGDATRAARTTRT                     |
| <b>For Group I SERA genes conserved regions</b>                            |                                            |                             |                                           |
| F1                                                                         | GGAAAYTTYAARDTNGAYATGTATGGWCC              | R1                          | TYACATKCCACARTADAYRCAYTTATARTT            |
| F2                                                                         | CAYTGAAADATATGYCRYAYA                      | R2                          | GADGCRAARRCCCCARCARTTYCC                  |
| <b>For hesB gene conserved regions</b>                                     |                                            |                             |                                           |
| FI                                                                         | GTAGAAGCWGGDGGWGTGYTCAGG                   | RII                         | CAYTTRGADAKRITYTGWATATTYTC                |
| Fla                                                                        | GTWGAAGCWGGRGGDTGYTCAGG                    |                             |                                           |
| FII                                                                        | ARYGAHGCWATVAAYAAAATGAAASAAATAAAT          |                             |                                           |
| <b>specific primers</b>                                                    |                                            |                             |                                           |
| <b><i>P. malariae</i></b>                                                  |                                            |                             |                                           |
| PmaSERA1-5F                                                                | GGAAGTCTTTGCAACGTTCTACTTTATTT              | PmaSERA1-3R                 | GGAATGAAGTAAAAAATGTTCTTAATGCTTTTACG       |
| PmaSERA2-5F                                                                | CAGACCTTTTCTTCATATCAATGTTTTAATTTCCCTTAGGTA | PmaSERA2-3R                 | GGTTTTATACAAAACAGAAAAAGCAGTCATCTGTTTTCTCT |
| PmaSERA3-5F                                                                | CACCTCATTITAGCTTTTACATTCAACAAAATGATGATCCT  | PmaSERA3-3R                 | CTGTTTCCGTTATGCGTAACGCTATCTATGTTATATGC    |
| PmaSERA4-5F                                                                | GATTTCTGCGACTATATATTAATTTCTGTACAACAAAAT    | PmaSERA4-3R                 | CCCAATGTTATTTTCTTCCAAACAGATAATCGCTTCT     |
| PmaSERA5-5F                                                                | GAACGTAGTAATATGTGCTAATGATACAGTTACCTCCGTT   | PmaSERA5-3R                 | GCTACTGCTGTTTCATAACGATAAAAAAATGCCGAGGAG   |
| PmaSERA6-5F                                                                | GCAACAAGATGAAGTATGGTATTCTGTACATTTTTATG     | PmaSERA6-3R                 | GTAAAAATTTTACACGAAACAGAAAAAGGCATTTGTTCCG  |
| PmaSERA7-5F                                                                | CAGTTTACGATGTGTATGGTTCCATTAATATATGAGCACA   | PmaSERA7-3R                 | CTAAAAACAGGAAAGTAGCGTAGTATTATATTGTCCTTTT  |
| PmaG3-5F                                                                   | CGTATAACCATTAATCTAACCGATGATACGACTTGTAT     | PmaG3-3R                    | GGATTTCTCTTCTTAAAAGAGGAAAAATCAATGCATTTAA  |
| PmaG2-5F                                                                   | CACAGAACAATAATAATGTACAGGTTAATACGTC         | PmaG2-3R                    | CAATGACTGAAGCGATAAAGATCTCCTAC             |
| PmaG1-5F                                                                   | GATATCACGCATGATTTCTACACATTTGTCTA           | PmaG1-3R                    | GAGGCCAAATTGGAACCACATTACATG               |
| PmaHP1-F                                                                   | GTTGGTATATGTGATTTTTCCGTGTGAAAGGGAA         | PmaG4-R                     | CATACGYTAAGCACCTTCTTTCCGTTAAGGTCAT        |
| PmaSERA1-F                                                                 | GCATGAAGTTATGCACAAAGGATCTGTAATTGCTTAT      | PmaSERA2-R                  | GCCGAACTGCTCGCATGTTTCATAACCCTT            |
| PmaSERA2-F                                                                 | CGTTGGAAAACCGAAGCTAGCGAATCATGTAGAAA        | PmaSERA3-R                  | GATGTGACAAGTAGTTGTGTTCTGCTCGGACT          |
| PmaSERA3-F                                                                 | GCCTTTGACAAATGTCAATAAGAAGAAAGAAAGCCGAA     | PmaSERA4-R                  | CATAGGCAATCAGACCCCTTTATGCATAATTTTCATGCTT  |
| PmaSERA4-F                                                                 | GCTAAAGGATATACCGCCTATGAGAGTGACAAA          | PmaSERA5-R                  | CACAGTTAGCTACGTATAAAGCCGAAATGCTTCCATGTT   |
| PmaSERA5-F                                                                 | GTAATGGGTTATGATCTTAAACGAAAGAAGGTGCTTA      | PmaSERA6-R                  | CCCTTCATACATCTAATAGTTTCGAGATGTAATTTAGAT   |
| PmaSERA6-F                                                                 | CGGAAAGAAGGTGCTTAGCGTATGTGGTGATAA          | PmaSERA7-R                  | GCGTCCATGTTTCCCTTAAATTTATCACTCTCATA       |
| PmaSERA7-F                                                                 | GCAGCCGATGATAATACGAACGAAGTTGAACTAACAGAAT   | PmaSERA7'-R                 | CGTCAGACATTCAGAGCATCCTCTCCCTGTGTTCCCTAA   |
| PmaSERA7'-F                                                                | CAACAGTTTGAGCGCAGAAAAGGCTAATGATTTGAAGAAT   | PmaG3-R                     | CAGTACATCTATGTTTAGGTTTCTCTTAGAACAGTT      |
| PmaG3-F                                                                    | GGGGACAGAGTACCAGATCATGCAGCAAATAT           | PmaG2-R                     | CTACTAGAACAGTTTGCACAAACAATGCAGAACTTCTA    |
| PmaG2-F                                                                    | GCATCTAAGTTACATGTAGAGACTATTAGATGTAT        | PmaG1-R                     | GTTGATGCTAAATCGTTAGGTAAGGGATTATCTA        |
| PmaG1-F                                                                    | GTAGAAGCTGGGGTTGTTCCAGATTTCCAGTA           | PmaHP2-R                    | CAACAGCATGTTTATCTATAATTACAACACATTCTTA     |
| <b><i>P. ovale</i></b>                                                     |                                            |                             |                                           |
| PovSERA1-5F                                                                | GGATGAAGTCTCATGTTTCCATCATTGTAACACTAT       | PovSERA1-3R                 | GTGTCAAGCATATGCACCTTCATCCTTATTTAAAGT      |
| PovSERA2-5F                                                                | GTGTAACGCAATGAAGTCACTTATTCCCTTCTT          | PovSERA2-3R                 | GCATAAAGTCAATTTTATAGCAACGCTTTACACATA      |
| PovSERA3-5F                                                                | CCTCTCTTCTGGTGCTGTGTAAGGCCA                | PovSERA3-3R                 | GCTTGCTGAATGCGCAATATTTTCCCTTACCTT         |
| PovSERA4-5F                                                                | CTAAACTTACTCAGTGTCTACTAGTTGTATCCAAATGAAGA  | PovSERA4-3R                 | CATAATCCGTTATATGCCGAAAGGAATATGCATA        |
| PovG3-5F                                                                   | CAAACATAGCACCTTTACCGACTGGTCCGA             | PovG3-3R                    | GAATTGGAATCCGTTTGTGCGTCTTATACGTA          |
| PovG2-5F                                                                   | GTGCACAGAATGACACTTAAATCTTCATAAAGAAGTGT     | PovG2-3R                    | GAGATGAGGATCATACGATGGACACTTTTTATA         |
| PovG1-5F                                                                   | CAAAATGAAGAAGGCTACTTATTTGATGCTACTCCTA      | PovG1-3R                    | GGACAGTAATAACTCCCAGTTACATGCCGCA           |
| PovHP1-F                                                                   | CTTGAACATCGGATGAGCATCATTTTAAAG             | PovSERA1-R                  | CTTAGTCCCTACCGAATTAGGTGTAGGTACAT          |
| PovSERA1-F                                                                 | GTACAGTAGATCTGGAACAGTAGCAAATG              | PovSERA2-R                  | GTGTGATATTGCAGTTCCTTGTCCATTT              |
| PovSERA2-F                                                                 | GGTCTCTGTTATTGCTTACGTAATGCAGAAAA           | PovSERA3-R                  | CAGTTCTCACCCAGCTGTTTCTAACAAT              |
| PovSERA3-F                                                                 | GGTAAAGAGCGAAATCAAGAATAAAGGTTT             | PovSERA4-R                  | CTTAGTCCCTACCGAATTAGGTGTAGGTAC            |
| PovSERA4-F                                                                 | GGTAAAGAGCGAAATCAAGAATAAAGGTTT             | PovG3-R                     | CATTTATCCTTAGGTTTAGGACTCATTT              |
| PovG3-F                                                                    | CTGCTTTATATGTTGCGAACTGTTCAAAGAGAAAA        | PovG2-R                     | GGATTAGAACCAACATTACATATATCTTCATGTTTCTT    |

PovG2-F CGCATTATTTATTGCAAATTGTTGAAAAGAAAACATGAA PovG1-R GGTAACGGCTTATCAATTGTTCTCCATGCATT  
PovG1-F GGGTTAGGATTCTCTGAACCCCTCAGTTAA PovHP2-R CAGAAGCCTGTTTATCGATTATCACAAACACATTCT

***P. cynomolgi***

PcySERA1-5F GCCAAAATAGCATGAATCATATGGTCTCTG PcySERA1-3R GAACTACTTCTACGTGTATGCTCATTATCC  
PcySERA2-5F CTACACAACAAAATGAAGTTGACCCCTC SimG4-R1 CRWARCAGAARWARCARTCGTTTTTTTTYTTCC  
PcySERA3-5F CCAAGGATAATCCTTCGGCTTTTTTACC PcySERA3-3R CCTCTTTTAGTGACAACATGTTACACGAA  
PcySERA4-5F CTCCTTTTACACACTTAAGAGTGGA AAA PcySERA4-3R GAAGTTGCACATACATACGTACTACTG  
PcySERA5-5F GAAAGTTACACACGTACTCCAAGAGTATG SimG4-R2 CACRAARCAGAAGAAGCADTCTGTTGYTTCC  
PcySERA6-5F GAAGAGTAGAATGATTATATCGTTTTTCGT PcySERA6-3R CTTTTATTGTACCGGTGAGAAGTAGCCA  
SimG4-F4 GATGARGTCTAGTBTTYTYTTGTTGCTCGC PcySERA8-3R ATAAAAATGTGCCATTTTGATGACACAAAAG  
PcySERA9-5F GATTGCAACAGAAGTAGTCAAGCCAGATT PcySERA9-3R CTATGCCTGACTCGTTTTACCCATTTC  
PcyG3-5F GGTTTAAAACAAATCCTACACCACACCTG PcyG3-3R CAAGTATCCTTTGAAAGAACGCTAATTTAA  
PcyG2-5F GTATGTGAAGTCTCAACGAATCTAGCTTGA PcyG2-3R CATAGGCACATCAGCCGAAAATTAACAT  
PcyG1-5F GCTTTACCTGTTTATCACTCCTGTCTACA PcyG1-3R CCTTATTACATGCCACAGTAAACACACTTATAG  
  
SimHP1-F CATATTTAAGMGAATCMRCTTCTGATTTT PcySERA1-R GGTCTTTTATCACCACACAGGCTATGT  
PcySERA1-F CAAATGTGAAACTGTTAGAACCCTCAGATG PcySERA2-R GACAGACGTTATTACCTCTTTGTAAGAGTA  
PcySERA2-F GTTCTGTCATGACGAATGGAATAACTGC SimG4-R2 CACRAARCAGAAGAAGCADTCTGTTGYTTCC  
PcySERA3-F GGATCCGTTATCGCGTATGTGAAGGC PcySERA4-R GACAGACGTTATTACCCGCTTTGTAAGAGTAT  
PcySERA4-F GGATCCGCAATCGCGTATGTGAAGGC PcySERA5-R GGCGAGCCTTATTACCCGCTTTGTAAGAGTAT  
PcySERA5-F CTTTCTCCACAGATGTCGATAAACAAGC SimG4-R3 CCTTCACTCGTTYGCRTCYYTTCAGTAG  
SimG4-F3 CTACTGAARGAYGCRAACGGAGTGAAGG PcySERA7-R CTCGGGGAAAAGAAGTGAACGTTTTTAAT  
PcySERA7-F GGGTCCGTTATCGCCTACGTGAAGGC PcySERA8-R GACAGACGTTATTACCTCTTTGTAAGAGTAT  
PcySERA8-F GGATCCGTTATCGCTTATGTGAAGGC PcyG3-R CTCATGAGATGGCCATACAATTTATGAAAAGA  
PcyG3-F GGGTATGGAACATATCAATAGGAAAGGA PcyG2-R TAAAGCAGAGCTTCGAAAAGTGACCATAT  
PcyG2-F GAGGATATGGTCACTTTGAAAGCTCT PcyG1-R ACTTCTCCTCGATTGGATACACTTT  
PcyG1-F CTATGCTTCGTATACACTATGCTGCACATA PcyHP2-R AAAAGGAATACTGGAATCCTGAGCACC

***P. fieldi***

PfiSERA1-5F GAAGTCGCAGGAAATTTAGTTCATTCCAGG PfiSERA1-3R GTGTATGCTAATTTATCCCTGTGCGAATC  
PfiSERA2-5F GAGATCGTAGAATAGCTACTTTTAATTTCCA SimG4-R1 CRWARCAGAARWARCARTCGTTTTTTTTYTTCC  
PfiSERA3-5F CAAGATGAAGTTTCGCATTAGTGCCCTT PfiSERA3-3R GACGTAACATACACGTAGTTCGTTTG  
PfiSERA4-5F GAATGATTCATATCATTTTTGTTGCTCCGC PfiSERA4-3R CTCTCATATGTAGCAGAAAAAGCAGTCGT  
SimG4-F4 GATGARGTCTAGTBTTYTYTTGTTGCTCGC PfiSERA5-3R GTTTAACTTTTATGAAAAATGCTTCACGTGG  
PfiSERA6-5F CAACAGAAATAGTCAAGCCAGATTTGCAA PfiSERA6-3R GACTCGTTTTACCCATTTGAGCTTTTACA  
PfiG3-5F GTAGCAATAGTAAACTAATTCGTAGGAAGCAG PfiG3-3R GTTCACAATTTGGAGCTGCGTTTTCTG  
PfiG2-5F GTTTCATACAAGTCAAACCAAGTGTGTAAC T PfiG2-3R CATCAGCCGAAAATTAACATCAAAATGGAG  
PfiG1-5F GCGAAAGGACAAGTCCGATCATTACA PfiG1-3R CTTATTACATGCCACAGTAAACGCACCTTATA  
  
SimHP1-F CATATTTAAGMGAATCMRCTTCTGATTTT PfiSERA1-R CTGCCTCTATGTTTGAGAAGCAACTAT  
PfiSERA1-F CGTTTTCAAAGATATGCACCTCCCTGGG PfiSERA2-R CTTACCTCCACACAGAGAGAGAACA  
PfiSERA2-F CGAGTGTATACAGTTCTGTTATGACGAATG SimG4-R2 CACRAARCAGAAGAAGCADTCTGTTGYTTCC  
PfiSERA3-F CAGGAGCACTCAGTTACGACTTCAAC PfiSERA4-R CTGCGTGGTTAGGTGTCTCGCTACTG  
PfiSERA4-F GTTGGTAAAATCAGAAGTATGAGCAAAGG PfiSERA5-R GAAGTGAGGCAATTTTAAATTTCAAAAATGG  
PfiSERA5-F GTTATGGTAACTACATAAACGGGGAGGG PfiSERA6-R AAGTCGTAAGTGAAGTCTCCTGCCGCC  
PfiSERA6-F GAGTGACCACTTCAATGGCAACATGGA PfiG3-R GTCCATACAATTTATTAGACAGTAACTTGC  
PfiG3-F AACATTCAGAGTGGACATGCATGGA PfiG2-R CTCTACCTCAATGTTTAAAATACAAC T  
PfiG2-F GTGCACAGCATGTGTGGACATAATGA PfiG1-R TTGCATAACACTGCACCCTTACAAT  
PfiG1-F GACCTGTGCAAGCATTATACATCCATTG PfiHP2-R GTTTTATCCATTAGGGAAAAGGAATACTGG

***P. simiovale***

PsoSERA1-5F CCAAAAATAGCATGCATCATATGGTCTCTG PsoSERA1-3R CATATGTGTAGAAGTACTTCTACGTGTATG  
PsoSERA2-5F GCCCTTCCGTTCTTTTTTACTACTAAGTAA SimG4-R1 CRWARCAGAARWARCARTCGTTTTTTTTYTTCC  
PsoSERA3-5F GTATGAGGCAAGATGAAGTTTCGCATCT PsoSERA3-3R CATCACATTCTTTTACACAAAAGCAGAAGAAG  
PsoSERA4-5F CATACTGCAAAAATGAGGTCTTGCATGT PsoSERA4-3R CGCTGTTGTACTTGTCTCTTCAAAAATGC  
SimG4-F4 GATGARGTCTAGTBTTYTYTTGTTGCTCGC PsoSERA5-3R CACGTAGCATTGAAGAAAAGGCTCATAAA  
PsoSERA6-5F GAAATAGTCAAGCCAGATTTGCAACCCA PsoiSERA6-3R CTGACTCGTTTTACCCATTTGAGCTTTTA  
PsoG3-5F CAAATACTACACCACACTGAGCAACTT PsoG3-3R GATTACAATTTGGAGTTTGGAGCTGC  
PsoG2-5F CTCAACGAATCTAGCTTAAAGGCAGTACG PsoG2-3R CTCTACACGCTGCAAAAATGCAGTTA  
PsoG1-5F CGAAAGGACAAGTCCGATCATTACACAA PsoG1-3R GTCGAGCAAAAATATCATTTTGTGGCATT  
  
SimHP1-F CATATTTAAGMGAATCMRCTTCTGATTTT PsoSERA1-R GGATTCGATCCAGAAGTGCATCTACTTT  
PsoSERA1-F CTTACGTCAAAGCGCTAGGCGTCTTG PsoSERA2-R TTGACATTTGTCTTTCGCTTCTTTACT

PsoSERA2-F GTCATGATGAATGGAATAACTGCAAAGGAG  
PsoSERA3-F CGGACATAGATAAGCTAGATGACTGTGTT  
SimG4-F3 CTAAGTGAARGAYGCRAACGGAGTGAAGG  
PsoSERA5-F GAAGAAGGTGCTCTCTCTGTGTGGAGG  
PsoSERA6-F GTTACGACCTGAACGGGAAGAAGGT  
PsoG3-F GGTATGGTAACTACATCAATACGGAGG  
PsoG2-F TGGCTACGGAAATTACATCAGTGTAAAT  
PsoG1-F GACCTGTGCAAGCATTATACATCCATTG

***P. inui***

PinSERA1-5F GAAGTCGCAGGAAATTTAGTTCATTCGGGA  
PinSERA2-5F GCTACTTTTAATTCTACACAACAAAATGCA  
PinSERA3-5F GTGTAACAAAATGAAGTCTCGTTTTGTGT  
PinSERA4-5F GATGAAGTCTAGTCTTTTTTTGTTGCTCGC  
PinG3-5F GTTTAAAACAAATACTACACCACACGTGAG  
PinG2-5F CATGCATTTCTGTGTATGTGAAGTCTCAA  
PinG1-5F CTCGCCAGTTAACACAAAAGATCATCAC  
  
SimHP1-F CATATTTAAGMGAATCMRCTTCTGATTTT  
PinSERA1-F CAAAGGATCCGTTATGGCTTATGTCAAAGC  
PinSERA2-F GAATGGAATAACTGCAAAGGAGAGTTCTC  
PinSERAX-F GTGTGCATACTTCTGCCAACATTTCTCTC  
SimG4-F2 GGAARCAACGAMTGCTTCTTCTGYTTYGTG  
PhySERA4-F GCTGTCAACATAATAGGCTATGGTAACTACAT  
PinG3-F AAGTCTTCTGTGAGGAAAAT  
PinG2-F AATTCTGCCTCAAGAACTGGAATCCTG  
PinG1-F GATCCAGCAGAGTGGACAAAAGGATA

***P. hylobati***

PhySERA1-5F GAAGTCGCAGGAAATTTAGTTCATTCGGGA  
PhySERA2-5F CCTTCAGGTAGCTAACTTGAAGGATAAG  
PhySERA3-5F GTTACAGTCACTTTTGCCTAATATCGTGTA  
PhySERA4-5F GGGAAAGTGTAAATACAGATTTGACTTAAACCG  
PhyG3-5F CAAATACTACACAACACATGAGCAACTAGG  
PhyG2-5F GCCTGAACACACAGATGTTATGTTTCATAA  
PhyG1-5F GCAGTTAGCACAAGAATCATCACCTCAT  
  
SimHP1-F CATATTTAAGMGAATCMRCTTCTGATTTT  
PhySERA1-F CTTAGAACCCTCAGATGAGGCCAATTC  
PhySERA2-F GACGAACATGCAGTCCACCAGTTTTATT  
PhySERA3-F CAAATTTGGTAAAGTCAGAAGTGAATGAACA  
PhySERA4-F CAAATTTGGTCAAATCCGAAGTGAATGAACA  
PhyG3-F GGGTGAAGAGATCCTACTGGATTATTA  
PhyG2-F TGCACCCATTTCTGCCTCAAGAACT  
PhyG1-F GTCTCTGTAGGAACAACCTGCCATAA

***P. coatneyi***

PcoSERA1-5F GAAGTCGCAGGAAATTTAGTTCATTCGA  
PcoSERA2-5F GTCGTAGAATAGGTACCTTTAGTCTACAC  
PcoSERA3-5F CCATCACCCGTATATGACATGATGAAGG  
PcoSERA4-5F GATGAAGTATAGTTCTCTTATTGCTCGC  
PcoTSERA2-5F GACAAAATGAAGGCTCACCTTCTCTTAAT  
PcoG3-5F CTATACCACACCTAAGCAACTTGGCAG  
PcoG2-5F CAACGAATCTAGTTTGAAGGCAGTACGA  
PcoG1-5F GCGAAAGGACAAGTCTGATCACTACAT  
  
SimHP1-F CATATTTAAGMGAATCMRCTTCTGATTTT  
PcoSERA1-F CCACGCAAGTGAACATAATCGGCTAC  
PcoSERA2-F GTACAAAATAACGGTTACGATGGTGTATC  
SimG4-F2 GGAARCAACGAMTGCTTCTTCTGYTTYGTG  
PcoSERA4-F GGAGTGAAAAAATCCTATTGGTTGTTGCA  
SimG4-F5 GHTATGYGAAGCYAACTGGAGCAAATGTGAA  
PcoG3-F GGTACACAACATGTGTGGTGATAAAGTA  
PcoG2-F TGGTACTGCTTAACTAAGATGTACACGG  
PcoG1-F CCTGTGCAACATTATACGTCCATT

SimG4-R2 CACRAARCAGAAGAAGCADTCTGTTGYTTCC  
SimG4-R3 CCTTCACTCGTTYGCRTCCTYTTACAGTAG  
PsoSERA5-R CTGACCAGTTGTGCATATCACTACATTG  
PsoSERA6-R GCCATTGAAGTGGTCACTCTGGTAG  
PsoG3-R CGTATCCAATTACATCCTTCGTTTTGATG  
PsoG2-R CAAAGCGGAGCTTCGGAAAGTA  
PsoG1-R CCATTCAATTTGGAGCACTAGAGGAAAAG  
PsoHP2-R CAACGGATACCTTCAATGCTTTTTGAGTT

PinSERA1-3R CAAATACTTCAACGTGTAGGCTCATTATCC  
SimG4-R1 CRWARCAGAARWARCARTCGTTTTTTTTYTTCC  
PinSERA3-3R CATTAAAGCGACGTAACATACACGTAGGT  
PinSERA4-3R CAAAGGTGATCACTCCTTATGCATACAAGA  
PinG3-3R GTTAAACAATTTGGAGCTGCGTTTTCTTCA  
PinG2-3R CGGAAAATTAACATCAAAATGGAGCGAC  
PinG1-3R GGAGAATATGCCTCCCTTATTCCATGC  
  
PinSERA1-R CAAATTTTCCCACAGATTCTGCCAATGAT  
PinSERA2-R CGTCTTTATTGGAACAATTAGCCACGTA  
SimG4-R2 CACRAARCAGAAGAAGCADTCTGTTGYTTCC  
PinSERA3-R CATTAAAGCGACGTAACATACACGTAGGT  
PinSERA4-R CGTCTTTATTGGAACAATTAGCCACGTA  
PinG3-R GTTAAATCGTATCCAATTACGTCCTTCG  
PinG2-R TATAAAGGATCGGTCTTCTCTCTTTG  
PinG1-R ATTGCATAACACAGCACCGTTACAATT

PhySERA1-3R GAATTACTTCTACGTGTATGCTCATTATCC  
PhySERA2-3R GGTGGCCACATTACAATATTTTACACG  
PhySERA3-3R GGGATATAACATACACGTAGGTATGCTTTCC  
PhySERA4-3R CATCACATGCATGTTGATTAAGCAAC  
PhyG3-3R GGAACGCTAATTGAACATATGCATATGTTTAC  
PhyG2-3R GCCACATGAGCCTGAAATTAACATCAAAAT  
PhyG1-3R CTTATTCCATGCCACAGTAAACGCATTTAT  
  
PhySERA1-R GGCTCATCTGAGGGTTCTAAGAGT  
PhySERA2-R GAAGGTCCGATTCGATGGCAAAAAT  
SimG4-R2 CACRAARCAGAAGAAGCADTCTGTTGYTTCC  
PhySERA4-R GTCTTCTCTAGGATGTCCAAAATTCACAC  
PhyG3-R CGACTGTACAGATCTCTTTTTTTGTTCCCTT  
PhyG2-R TTGTTCTCTACCTCAATGTTTGAAGT  
PhyG1-R TAAATCGTTAGGAAGCGGTTTGGTAATTAT  
PhyHP2-R GAGGAACTCTATCATAAACGACTAACTC

PcoSERA1-3R CTCACACGTAGCAGAAAAGCAATCGC  
PcoSERA2-3R GTGGCCTAAATTACAATATTTTACACGTAG  
PcoSERA3-3R CACACGTATGTTTCTTTGCCGATTTAA  
PcoSERA4-3R GCATTAACATTTGCACACTCTCATGCAT  
PcoTSERA2-3R CTCGTTTTATCCATTCCGACATTTACACATAA  
PcoG3-3R GTTTACAATTTGGAGCTGAGTTTCTGCG  
PcoG2-3R GTTCTTTTGAACCTCTCTAGACGCTG  
PcoG1-3R CTGATTATTTGCCACGTGAGCAGAA  
  
PcoSERA1-R CTCTATGTGTGAGAAGCAACTATTTTTATC  
PcoSERA2-R GCAAAAAGCCATGACGTGGCAGATC  
PcoSERA3-R GCGTTTCTTCACTTCCACATAGAGACAGT  
PcoSERA4-R GTGTTACTTGTACTTGTGTATCCGAAACTG  
SimG4-R5 CATTTCGAGCTYTAYACATAGCAGAAGRAAC  
PcoG3-R CAGTTTGAACGTACAATGCTGAGCTAC  
PcoG2-R CTTTCTTCTGGATCTCTCTTAGAGCAATC  
PcoG1-R GCATAACACTGCACCGTTACAAT  
PcoHP2-R CTACAGATACCTTCAAGGCTTTTGGAG

**P. knowlesi**

PknSERA1-5F GGAAATTTAGTTCATTTCGATGAGACGCCA  
PknSERA2-5F GCGCTAAGCATAATTTCTCTGCTTTTTCT  
PknSERA3-5F CTTAATGCAGATTTAACTGAACCGAAGCAA  
PknTSERA2-5F CCCACCTCTTGATAGGACTAGGACAAAA  
PknG3-5F GACATCTGAGGAATTGTCAATCGAGCAA  
PknG2-5F CAACGAATCTAGTTTGAAGGCAATACGAC  
PknG1-5F CATTACCTGTTCTTCACTCCTGTCTACG  
  
SimHP1-F CATATTTAAGMGAATCMRCTTCTGATTTT  
PknSERA1-3F GATTGCTTCTCTGCTACGTGTAACACATT  
PknSERA2-3F GAAACAACGAATGCTTCTCTGCTTTGT  
PknSERA3-3F CGAATGACTGTAATTTTTGTTTCGTGTGAA  
PknTSERA2-3F CAGTGCCAGGATTCTGTTTATACCAATA  
PknG3-3F GAAGAATGCAAACTGTTCTGTGAGGAAAAAC  
PknG2-3F AAATAACTGCATTTCTGCAGCGTGTAG  
PknG1-3F GACCTGTGCAAACATTATACATCCATTGG

PknSERA1-3R GCCCATATTACAATGTTTTACACGTAGCAG  
PknSERA2-3R CATAGGTTTGTGTGCTCAATTTAGCAAGGA  
PknSERA3-3R CATCAACACATGTATGTGCATCGAGAAAC  
PknTSERA2-3R GTGACTCTTTTTACCCATTTTCGAGCTTTA  
PknG3-3R CACATTTTGGAGCCAAGTTCCTGCTTAT  
PknG2-3R CTGGAGATAACCCAAATCATTGTGTTTAC  
PknG1-3R CTATTCTCAACCGTCTTGCCACGAATA  
  
PknSERA1-5R CCAGGTGAAAGAGATCCTGGGATTTCAT  
PknSERA2-5R CATTGTTACCTATTAGCAGAAGGGCACAG  
PknSERA3-5R GCGAGCAACAAAAGAAAACCTAGACTTCATC  
PknTSERA2-5R GTATTAAGGAAAAGGCGAGCCTTCATTTTG  
PknG3-5R CTAAAAAAGAATAAGGGCCACGGGTGCG  
PknG2-5R CTTAAAAGGACGAAAAGCGAGAAAACC  
PknG1-5R GAACACCACGTACTGTGCTATCTGATTTA  
PknHP2-R GTTTGATATCAAACGAGTTGCCACAGG

**P. fragile**

PfrSERA1-5F CATATCCTTTTCATCGTCTCGCATCCTG  
SimG4-F3 GATGARGTCTAGTBTTYTYTTGTTGCTCGC  
PfrTSERA2-5F GAAATAGTCAAGCCAGATTTGCAATCCA  
PfrG3-5F GGTTTAAAACAATAACTACACACCACCTG  
PfrG2-5F GCATCCATTTCTGTGTATGTAAGTGTCAAC  
PfrG1-5F GCTTTACCCACTCTTCACTCCTGTCTA  
  
SimHP1-F CATATTTAAGMGAATCMRCTTCTGATTTT  
PfrSERA1-F GAGGAGGGAATGAAAAGTCTACTGGTTGTTA  
PfrSERA2-F CTTCAACGGTAACATGGACGCGTTTAT  
PfrG3-F CCAACTGCTCCAAAAGGAACCGAAA  
PfrG2-F TTAACGAAGATGTACACGGGCACTA  
PfrG1-F GGGTATCTGAAATGACTGCTACGATATGGG

PfrSERA1-3R CACTCGGTCTCCACAAAACTGTATCAT  
PfrSERA2-3R CATTGCGAGATGCATCAGAACGTGTATG  
PfrTSERA2-3R GACTCGTTTTACCCATTTTCGAGCTTTTTA  
PfrG3-3R CCTCAGACATAGCAGAAGTAGCAGTTG  
PfrG2-3R GACTAAAATTAACATCAACATGGAGCGACG  
PfrG1-3R CAACAGGTACAACCTTAGGGAGAATCTGTTT  
  
PfrSERA1-R CATTGTGCATGCGCTTTATTATTCAAACAGTTG  
PfrSERA2-R GAGTATCTCCCCATCAGATATAGCTCC  
PfrG3-R GTACATCATAAAATGGCCATACAATTTGTGAG  
PfrG2-R GATCTGCATCAAGTTTTCCACATATTAAG  
PfrG1-R CCTGATAAGAAGCAATTCGGTATGGC  
PfrHP2-R AAAGGAATACTGGAAGCCTGAGCAT

**P. gonderi**

PgoSERA1-5F CAATCGTAGAACAGTTTGTTTAATTGTACACC  
PgoSERA2-5F GCAAGATGAAGTCTCATCTGTTGTTTCTCT  
PgoSERA3-5F GAAGCTTGAAGTCTACGCTCTTCTCATAAC  
PgoSERA4-5F GTGTGAATAGTACGAGTCTTAGAACATTT  
PgoSERA5-5F GCAACAAGATGAAGTATAGTATTCTCTTCTCT  
PgoSERA6-5F GATAATAAGACGAAATGAAAACCGTATTTCC  
PgoG3-5F CCAGTTTTGATGAAAATGATAATACGTCCT  
PgoG2-5F GAAACCAATAGGACAAAATGATTGCTGCT  
PgoG1-5F GCTTCTCAACTTAGTCTAAAATGAAAGCA  
  
SimHP1-F CATATTTAAGMGAATCMRCTTCTGATTTT  
PgoSERA1-F GAATATTTGAACATTCTGATGGCGAGAAG  
PgoSERA2-F GTAGGTAGTCATCAATCTCCATCCTTTGCT  
PgoSERA3-F CCCGGGTATTGTTTAGCTAAGAAGAAGG  
PgoSERA5-F GTGAATATAATCGGCTATGGAACTATA  
PgoSERA6-F CTTACCATCTGCATCTGACATGCCATATTC  
PgoG3-F TAGATATGCACGGACCCAAGAATTGTAAT  
PgoG2-F TATGGGCCAAAAAATGTGAACAC  
PgoG1-F GAACGATTTATTGACAAGTGCCAGTATT

PgoSERA1-3R GCAATATCTAACCCAGCCCTTTAACTATATG  
PgoSERA2-3R CTTGCAAATTGAAAATAAATTGCTCAAAGCG  
PgoSERA3-3R CTGTTTTACACAAGAGCAGAAGAAGCAGTC  
PgoSERA4-3R CGCACCTCTCAAATCATAAATTAGCTTTCA  
PgoSERA5-3R CATAAAAGGGTTCACATATTCTTGCATGCA  
PgoSERA6-3R GGAAAAGAAAATAGCTTACGCATTTCCACAC  
PgoG3-3R CCAGATCCTTTTAGTAAAATCCTGAGC  
PgoG2-3R CACGCTTACACATTACAGAAAAGCAG  
PgoG1-3R CATTATGAATGAGGTGAAACCATCACCC  
  
PgoSERA1-R CAGACATCGCCAACCAGGTTGTACGAATA  
PgoSERA2-R CAGTTAGCCACATATAAAGCAGAACTAGGAAC  
SimG4-R2 CACRAARCAGAAGAAGCADTCGTTGTYTTCC  
PgoSERA4-R CGAGTTCTTCTTGAACCGATTTTGAAG  
PgoSERA6-R CATTGTTAGTCTTTACATATGCGATGACTG  
PgoG3-R GAATTCTATAGGATTTGATCCCACTGTACATATATC  
PgoG2-R AACAGAGACCACAATCTCCTTGTCT  
PgoG1-R GCATTACATAATACTGCACCATTACAA  
PgoHP2-R GCAGCCTGTTGTCAATTATTACAATAC

\* The location of each primers in the *Plasmodium* SERA gene family shown in Figure S5
