# Supplementary material for: Clues to Evolution of the SERA Multigene Family in 18 Plasmodium Species
Source: PubMed Central journal article supplement (PMC3058004; doi:10.1371/journal.pone.0017775), 2011-03-15
Supplement: pone.0017775.s007.pdf [file pone.0017775.s007.pdf]

Table S2 SERA gene accession numbers in PlasmoDB database <sup>a</sup>

| Gene      | <i>Plasmodium</i> species (strain) |                               |                             |                                              |                            |
|-----------|------------------------------------|-------------------------------|-----------------------------|----------------------------------------------|----------------------------|
|           | <i>P. vivax</i><br>(SalI)          | <i>P. falciparum</i><br>(3D7) | <i>P. berghei</i><br>(ANKA) | <i>P. yoelii</i><br>(17XNL)                  | <i>P. chabaudi</i><br>(AS) |
| SERA1     | PVX_003850                         | PFB0360C                      | PB000108.03.0               | PY00291                                      | PCAS_030730                |
| SERA2     | PVX_003845                         | PFB0355C                      | PB107093.00.0               | PY00292                                      | PCAS_030720                |
| SERA3     | PVX_003840                         | PFB0350C                      | PB000107.03.0               | PY00292                                      | PCAS_030710                |
| SERA4     | PVX_003835                         | PFB0345C                      | PB000352.01.0               | PY02062 <sup>b</sup><br>PY00294 <sup>b</sup> | PCAS_030700                |
| SERA5     | PVX_003830                         | PFB0340C                      | PB000649.01.0               | PY02063                                      | PCAS_030690                |
| SERA6     | PVX_003825                         | PFB0335C                      |                             |                                              |                            |
| SERA7     | PVX_003820                         | PFB0330C                      |                             |                                              |                            |
| Truncated |                                    |                               |                             |                                              |                            |
| SERA1     | PVX_003815                         |                               |                             |                                              |                            |
| SERA8     | PVX_003810                         | PFB0325C                      |                             |                                              |                            |
| SERA9     | PVX_003805                         | PFI0135C                      |                             |                                              |                            |
| SERA10    | PVX_003800                         |                               |                             |                                              |                            |
| SERA11    | PVX_003795                         |                               |                             |                                              |                            |
| SERA12    | PVX_003790                         |                               |                             |                                              |                            |

<sup>a</sup> PlasmoDB; <http://plasmodb.org/plasmo/>

<sup>b</sup> The gene region of PY02062 and PY00294 was re-annotated and used as *P. yoelii* SERA4.
