# Supplementary material for: Clues to Evolution of the SERA Multigene Family in 18 Plasmodium Species
Source: PubMed Central journal article supplement (PMC3058004; doi:10.1371/journal.pone.0017775), 2011-03-15
Supplement: pone.0017775.s008.pdf [file pone.0017775.s008.pdf]

Table S3 Primers and probes used for the Real time PCR works

|                            | Forward primer (5'--->3')  | Reverse primer (5'--->3')  | TaqMan probe (5'--->3') |
|----------------------------|----------------------------|----------------------------|-------------------------|
| <b><i>P. cynomolgi</i></b> |                            |                            |                         |
| PcyTBB                     | CCATGTTTAGAGGACGAATGTCAA   | GGAATATCACAACGCTGGACTT     | CAGATGCTCAGCGTACA       |
| PcySERA2                   | AAGCACGATTGTTTCGAGGTCTT    | GAAGTGTATGCACTCGGCTAGCT    | TTCGCAGGACCCAGAG        |
| PcySERA3                   | TTGACGGGTAGCACAGGAGTT      | CCAAGGCATCTGCATTATCGT      | CTCCATTTCTTGAAGAACGT    |
| PcySERA4                   | CACCGTCGAGTCCGAGGTTA       | TCCACGGCATAACGCTCTAGA      | CCTTCAAATTCTGAAGCAT     |
| PcySERA5                   | GAGGAGCGGATCAACAAGTATCA    | TTGCCCTGTAGTTCCCGTAGTC     | CATTACCAGGAACTCC        |
| PcySERA6                   | TACGACAGTGATGCAGCGATAA     | ACTCATTCCAGTGGTCATCACAA    | CTCACGAGCAGTGGCA        |
| PcySERA7                   | TGGTGACGAGAATGGTCACGTA     | TCCAGCTTCTCCACAGTTGATG     | CGAATTGGGAGACCAC        |
| PcySERA8                   | CGCTGTGCTAGACACCCAAGT      | GATAGCCTCGTGATTCTTGTACGA   | TCACATGTCTAAAGTAC       |
| PcySERA9                   | GCTGAAGCATATTGACAAGTCCAA   | CCTCACAGAAGAGTTTGCATTTCG   | ATGACCACAGCTGCG         |
| PcySERA10                  | AGGGCATTTCGTGAGGTACGA      | CAGGAGGCCAGTTCTTGAG        | TGCATCCAATTCTG          |
| PcySERA11                  | GCGGACCTACTCCCTGGATT       | CATCCCAATGGACGTATAATGCT    | CCTAGCGGACGTCTC         |
| <b><i>P. coatneyi</i></b>  |                            |                            |                         |
| PcoTBB                     | CAGATGCTCAGCGTGCAGAA       | TGTCACAAACGCTGGACTTAGTG    | CTACTTCGTCGAATGGA       |
| PcoSERA2                   | CGGGTAGCCATGTCAGATGA       | GAGCGAGATGTTACGGGTTGA      | CACACCATGGCGTCCG        |
| PcoSERA3                   | GCTATCGGAATTAACCGGATCA     | TGGCACTCTCATCATCGTACGT     | CGTTCAAGGCGTAACAA       |
| PcoSERA4                   | CAATGCAGGAATGGAATCGA       | TCCCAAGTCGTACAGACCTTCAT    | TTCACGTTCTGAAACAC       |
| PcoTSERA2                  | CGTGATACGACAGAAGGTGATC     | CATGTGACAGTTGGGTGCCTAA     | CCAGCCTAGCACGTCA        |
| PcoSERA5                   | ACTACGATGATGAGGCGGCTAA     | TCCACTTGTAGGCACTACCACTGT   | CAAAGTACCGAAACAAG       |
| PcoSERA6                   | CACGTGCTTATATTGACGATGATG   | CCTGACCGTCGACTACAGCAT      | CGTGCTTGGTGAGAAG        |
| PcoSERA7                   | GCGGACCTACTCCCTGGATT       | AGACACCTCCCAATGGACGTAT     | CCTGCAGGGACAAC          |
| <b><i>P. knowlesi</i></b>  |                            |                            |                         |
| PknTBB                     | CCTCCTACTTCGTGGAATGGAT     | CCCTTTGGTGAATGTCACAA       | CACCAAGTCCAGCGTT        |
| PknSERA1                   | GGTCAACTGGAGGCAAATTCTG     | CCTCGTCACTGTCACCTTACACA    | CCATTGCAGCGTCTG         |
| PknSERA2                   | AAATGGAAGTGGCGGATTGA       | TCTGCACTCGGACCGCTATT       | TCCCTGGAATACG           |
| PknSERA3                   | TCACGAACCGAAGCATCATC       | TCGACAATTTGCACTCGGAAT      | CTGGACGAGTGCATAAA       |
| PknTSERA2                  | TGGACACGACTGCTCGAGATC      | TCTTACGCACTCTTCGTAATTG     | CTCGGTGAATCCAG          |
| PknSERA4                   | GAGGAAAAGTGAACAAGTGCAG     | CGCTGTACAAGTGGACAGACAA     | ACCACTACTCTCCTGGCT      |
| PknSERA5                   | GTGGGAGGTGCAGTTACACTCA     | TCGCTCAAAGTTCGTAATTCAC     | CCGTGGACAATTCA          |
| PknSERA6                   | TCCCAAGCAGACGTATCCTGTA     | GAGACACCTGCCAATGGATGTA     | CAGCATATTGACCTGTGC      |
| <b><i>P. berghei</i></b>   |                            |                            |                         |
| PbeTBB                     | GCTCCTTAAGATTTCCAGGTCAAC   | TCCTCGACTTGTTAAAGGAGCAA    | TTCCATTCCCAGGTTTAC      |
| PbeSERA1                   | TGAACCTGCCTCAATTTCTACACA   | GCCTGTTGATGGTATTTCTGATCTAC | CACATCAACCAACTGG        |
| PbeSERA2                   | AAGCCAAACATGCCCAAGTT       | GATCCGGAAGATGAACCTGAAG     | AGTGTCACACCAAGTC        |
| PbeSERA3                   | TTCAAATCCTAATGCCCAAAGC     | AATTGATGCGGCATTTGCA        | CCGTTACAGACACAGTCA      |
| PbeSERA4                   | TTCGAGGGTACAAAGTATTGGTTTAA | TTCACCAGAATATAAGGTTGCCAAA  | ACACTTCTCCTGGATATT      |
| PbeSERA5                   | CCCTCCAGAGATCCTGAATACG     | CACTAGGATCAAATCGTCGATTGT   | CCTAGTTACCCAAGTATG      |
